# Supplementary material
Source: ML conference proceedings conference paper supplement (https://openreview.net/forum?id=TJUNtiZiTKE)
Supplement: supplementary_material [file attachment]

499 **A Proofs**

500 *Proof of Proposition 3.3.* It is a direct result of Theorem A.1. □

**Theorem A.1.** *Assume*

$$dZ_t = \eta(Z_t, t)dt + \sigma(Z_t, t)dW_t, \quad t \in [0, 1].$$

501 *We have  $Z_1 \in A$  with probability one if there exists a function  $U: \mathbb{R}^d \times [0, 1] \rightarrow \mathbb{R}$  such that*

502 *1)  $U(\cdot, t) \in C^2(\mathbb{R}^d)$  and  $U(z, \cdot) \in C^1([0, 1])$ ;*

503 *2)  $U(z, 1) \geq 0, z \in \mathbb{R}^d$ ;  $U(z, 1) = 0$  implies that  $z \in A$ , where  $A$  is a measurable set in  $\mathbb{R}^d$ ;*

504 *4) There exists a sequence  $\{\alpha_t, \beta_t, \gamma_t: t \in [0, 1]\}$ , such that for  $t \in [0, 1]$ ,*

$$\begin{aligned} \mathbb{E}[\nabla_z U(Z_t, t)^\top \eta(Z_t, t)] &\leq -\alpha_t \mathbb{E}[U(Z_t, t)] + \beta_t, \\ \mathbb{E}[\partial_t U(Z_t, t) + \frac{1}{2} \text{tr}(\nabla_z^2 U(Z_t, t) \sigma^2(Z_t, t))] &\leq \gamma_t; \end{aligned}$$

505 *5) Define  $\zeta_t = \exp(\int_0^t \alpha_s ds)$ . We assume*

$$\lim_{t \uparrow T} \zeta_t = +\infty, \quad \lim_{t \uparrow T} \frac{\zeta_t}{\int_0^t \zeta_s (\beta_s + \gamma_s) ds} = +\infty. \quad (10)$$

506 *Proof.* Following  $dZ_t = \eta(Z_t, t)dt + \sigma(Z_t, t)dW_t$ , we have by Ito's Lemma,

$$dU(Z_t, t) = \nabla U(Z_t, t)^\top (\eta(Z_t, t)dt + \sigma(Z_t, t)dW_t) + \partial_t U(Z_t, t)dt + \frac{1}{2} \text{tr}(\nabla^2 U(Z_t, t) \sigma^2(Z_t, t))dt,$$

for  $t \in [0, T]$ . Taking expectation on both sides,

$$\frac{d}{dt} \mathbb{E}(U(Z_t)) = \mathbb{E}[\nabla_z U(Z_t, t)^\top \eta(Z_t, t)] + \mathbb{E} \left[ \partial_t U(Z_t, t) + \frac{1}{2} \text{tr}(\nabla^2 U(Z_t, t) \sigma^2(Z_t, t)) \right].$$

Let  $u_t = \mathbb{E}[U(Z_t, t)]$ . By the assumption above, we get

$$\dot{u}_t \leq -\alpha_t u_t + \beta_t + \gamma_t.$$

507 Following Grönwall's inequality (see Lemma A.2 below), we have  $\mathbb{E}[U(Z_1, 1)] = u_1 = \lim_{t \uparrow 1} u_t \leq$   
 508  $0$  if (10) holds. Because  $U(z, 1) \geq 0$ , this suggests that  $U(Z_1, 1) = 0$  and hence  $Z_1 \in A$  almost  
 509 surely. □

510 **Lemma A.2.** *Let  $u_t \in \mathbb{R}$  and  $\alpha_t, \beta_t \geq 0$ , and  $\frac{d}{dt} u_t \leq -\alpha_t u_t + \beta_t, t \in [0, T]$  for  $T > 0$ . We have*

$$u_t \leq \frac{1}{\zeta_t} (\zeta_0 u_0 + \int_0^t \zeta_s \beta_s ds), \quad \text{where} \quad \zeta_t = \exp\left(\int_0^t \alpha_s ds\right).$$

*Therefore, we have  $\lim_{t \uparrow T} u_t \leq 0$  if*

$$\lim_{t \uparrow T} \zeta_t = +\infty, \quad \lim_{t \uparrow T} \frac{\zeta_t}{\int_0^t \zeta_s \beta_s ds} = +\infty.$$

*Proof.* Let  $v_t = \zeta_t u_t$ , where  $\zeta_t = \exp(\int_0^t \alpha_s ds)$  so  $\dot{\zeta}_t = \zeta_t \alpha_t$ . Then

$$\frac{d}{dt} v_t = \dot{\zeta}_t u_t + \zeta_t \dot{u}_t \leq (\dot{\zeta}_t - \zeta_t \alpha_t) u_t + \zeta_t \beta_t = \zeta_t \beta_t.$$

So

$$v_t \leq v_0 + \beta \int_0^t \gamma_s ds,$$

and hence

$$u_t \leq \frac{1}{\zeta_t} (\zeta_0 u_0 + \int_0^t \zeta_s \beta_s ds).$$

To make  $\lim_{t \uparrow T} u_t \leq 0$ , we want

$$\lim_{t \uparrow T} \zeta_t = +\infty, \quad \lim_{t \uparrow T} \frac{\zeta_t}{\int_0^t \zeta_s \beta_s ds} = +\infty.$$

511 □

512 **Corollary A.3.** Let  $dZ_t = \frac{x-Z_t}{1-t} + \zeta_t dW_t$  with law  $\mathbb{Q}$ . This uses the drift term of Brownian bridge, but  
 513 have a time-varying diffusion coefficient  $\zeta_t \geq 0$ . Assume  $\sup_{t \in [0, T]} \zeta_t < \infty$ . Then  $\mathbb{Q}(Z_1 = z) = 1$ .

514 *Proof.* We verify the conditions in Theorem A.1. Define  $U(z, t) = \|x - z\|^2 / 2$ , and  $\eta(z, t) = \frac{x-Z_t}{1-t}$ .

515 We have  $\eta(z, t)^\top \nabla U(z, t) = -U(z, t)/(T - t)$ . So  $\alpha_t = 1/(T - t)$ .

516 Also,  $\partial_t U(z, t) + \frac{1}{2} \text{tr}(\zeta_t^2 \nabla_z^2 U(z, t)) = \frac{1}{2} \text{diag}(\zeta_t^2 I_{d \times d}) = \frac{d}{2} \zeta_t^2 := \beta_t \leq C < \infty$ .

517 Then  $\zeta_t = \exp(\int_0^t \alpha_s ds) = \frac{1}{1-t} \rightarrow +\infty$  as  $t \uparrow T$ .

Also,  $\int_0^t \zeta_s \beta_s ds \leq C \int_0^t \zeta_s ds = CT(\log(T) - \log(T - t))$ . So

$$\lim_{t \uparrow T} \frac{\zeta_t}{\int_0^t \zeta_s \beta_s ds} \geq \lim_{t \uparrow T} \frac{\frac{1}{1-t}}{CT(\log(T) - \log(T - t))} = +\infty.$$

518 □

519 Using Girsanov theorem, we show that introducing arbitrary non-singular changes (as defined below)  
 520 on the drift and initialization of a process does not change its bridge conditions.

521 **Proposition A.4.** Consider the following processes

$$\begin{aligned} \mathbb{Q}: \quad Z_t &= b_t(Z_t)dt + \sigma_t(Z_t)dW_t, \quad Z_0 \sim \mu_0 \\ \tilde{\mathbb{Q}}: \quad Z_t &= (b_t(Z_t) + \sigma_t(Z_t)f_t(Z_t))dt + \sigma_t(Z_t)dW_t, \quad Z_0 \sim \tilde{\mu}_0. \end{aligned}$$

522 Assume we have  $\mathcal{KL}(\mu_0 \parallel \tilde{\mu}_0) < +\infty$  and  $\mathbb{E}_{\mathbb{Q}}[\int_0^T \|f_t(Z_{[0,t]})\|^2] < \infty$ . Then for any event  $A$ , we  
 523 have  $\mathbb{Q}(Z \in A) = 1$  if and only if  $\tilde{\mathbb{Q}}(Z \in A) = 1$ .

*Proof.* Using Girsanov theorem [31], we have

$$\mathcal{KL}(\mathbb{Q} \parallel \tilde{\mathbb{Q}}) = \mathcal{KL}(\mu_0 \parallel \tilde{\mu}_0) + \frac{1}{2} \mathbb{E}_{\mathbb{Q}} \left[ \int_0^1 \|f_t(Z_t)\|_2^2 dt \right].$$

524 Hence, we have  $\mathcal{KL}(\mathbb{Q} \parallel \tilde{\mathbb{Q}}) < +\infty$ . This implies that  $\mathbb{Q}$  and  $\tilde{\mathbb{Q}}$  has the same support. Hence  
 525  $\mathbb{Q}(Z \in A) = 1$  iff  $\tilde{\mathbb{Q}}(Z \in A) = 1$  for any measurable set  $A$ . □

526 This gives an immediate proof of the following result that we use in the paper.

527 **Corollary A.5.** Consider the following two processes:

$$\begin{aligned} \mathbb{Q}^{x, \text{bb}}: \quad & dZ_t = \left( \sigma_t^2 \frac{x - Z_t}{\beta_1 - \beta_t} \right) dt + \sigma_t dW_t, \quad Z_0 \sim \mu_0, \\ \mathbb{Q}^{x, \text{bb}, f}: \quad & dZ_t = \left( \sigma_t f_t(Z_t) + \sigma_t^2 \frac{x - Z_t}{\beta_1 - \beta_t} \right) dt + \sigma_t dW_t, \quad Z_0 \sim \mu_0. \end{aligned}$$

528 Assume  $\mathbb{Q}^{x, \text{bb}, f}[\|f_t(Z_t)\|^2] < +\infty$  and  $\sigma_t > 0$  for  $t \in [0, +\infty)$ . Then  $\mathbb{Q}^{x, \text{bb}, f}$  is a bridge to  $x$ .

## 529 B Model Details

### 530 B.1 Model Architecture for Molecule Generation.

531 Following EGM [17], we apply an E(3) equivariant GNN network (EGNN) as our basic model  
 532 architecture. EGNNs are a type of graph neural networks that satisfies the equivariance constraint,

$$\mathbf{R}x' + \mathbf{t}, h' = f(\mathbf{R}x + \mathbf{t}, h) \quad \text{when} \quad x', h' = f(x, h), \quad (11)$$

533 where  $x$  and  $h$  represent the 3D coordinates and additional features, orthogonal  $\mathbf{R}$  stands for the  
 534 random rotation and  $\mathbf{t} \in \mathbb{R}^3$  is a random transformation. One EGNN is usually made up of  
 535 multiple stacked equivariant graph convolutional layers (EGCL), and every EGCL satisfies the

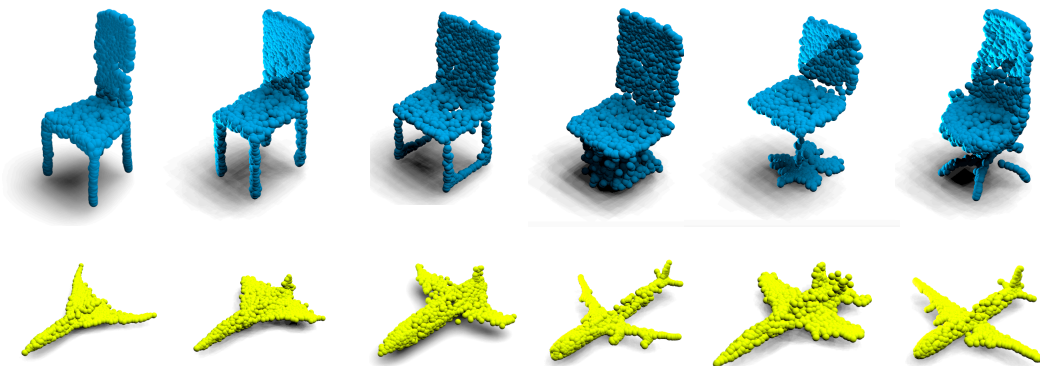

Figure 5: More visualization result of our Bridge-Statistic method, the upper row is chair category and the lower row is airplane category

536 equivariance constraint. Denote  $N$  the number of nodes,  $x^l$  and  $h^l$  the coordinates and features for  
 537 layer  $l \in \{0, \dots, L\}$ , we have

$$\begin{aligned}
 m_{ij} &= \phi_e(h_i^l, h_j^l, d_{ij}), \\
 h_i^{l+1} &= \phi_h(h_i^l, \{m_{ij}\}_{j=1}^N), \\
 x_i^{l+1} &= x_i^l + \sum_{j \neq i} \frac{x_j^l - x_i^l}{d+1} \phi_x(h_i^l, h_j^l, d_{ij}),
 \end{aligned} \tag{12}$$

538 where  $h^0 = h, x^0 = x, d_{ij} = \|x_i^l - x_j^l\|_2, d_{ij} + 1$  is introduced to improve training stability, and  
 539  $\phi_e, \phi_h, \phi_x$  represents fully connected neural network with learnable parameters. We refer the readers  
 540 to the previous paper [34] for more details.

541 **Scaling Features** Following [17], we re-scale the data with additional scaling factors. The atom  
 542 type one-hot vector and atom charge value  $\times 0.25$  and  $\times 0.1$ , respectively. It significantly improves  
 543 performance over non-scaled inputs, e.g. 47% relative improvements on molecule stability.

## 544 B.2 Model Architecture for Point Cloud Generation.

545 We build up our network based on the setup in point cloud diffusion work [25] without extra  
 546 modification for a fair comparison. The model consists two parts. The first part is a flow model that  
 547 learns the shape prior and the second part takes the shape prior and the noisy point coordinates into a  
 548 MLP style encoder as the denoise function. We refer the readers to the previous paper [25] for more  
 549 details.

## 550 C More Visualization for Point Cloud Generation

551 Below we show more visualization of our point cloud generation result in both chair and airplane  
 552 class. We focus on presenting our best performance Bridge-Statistic visualization in Figure 5.

## 553 D Discussion of Broader Impact

554 This research aims to generate molecules and point cloud samples with geometry prior guided bridge  
 555 processes. It is possible to be beneficial for drug design, the food industry and many other fields.  
 556 However, it might be used for generating harmful molecules and viruses.
